# Supplementary material for: Phosphorylation-dependent association of human chromatin protein PC4 to linker histone H1 regulates genome organization and transcription
Source: PubMed Central journal article supplement — Nucleic Acids Res. 2022 Jun 7;50(11):6116–36. doi: 10.1093/nar/gkac450 (PMC9226532; doi:10.1093/nar/gkac450), 2022-06-07
Supplement: gkac450_supplemental_file.pdf [file gkac450_supplemental_file.pdf]

A

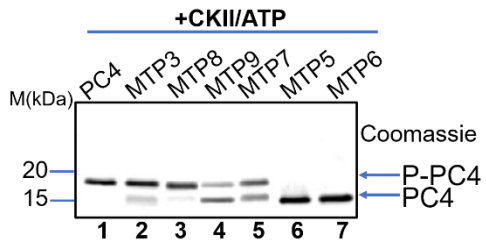

B

| Name | Residues Mutated | Phosphorylation Ability |
|------|------------------|-------------------------|
| PC4  |                  | ++++                    |
| MTP3 | 17               | ++                      |
| MTP8 | 13,17            | +++                     |
| MTP9 | 15, 17           | -/+                     |
| MTP7 | 13,15            | ++/-                    |
| MTP5 | 13,15,17,19      | -                       |
| MTP6 | 13, 15, 17       | -                       |

C

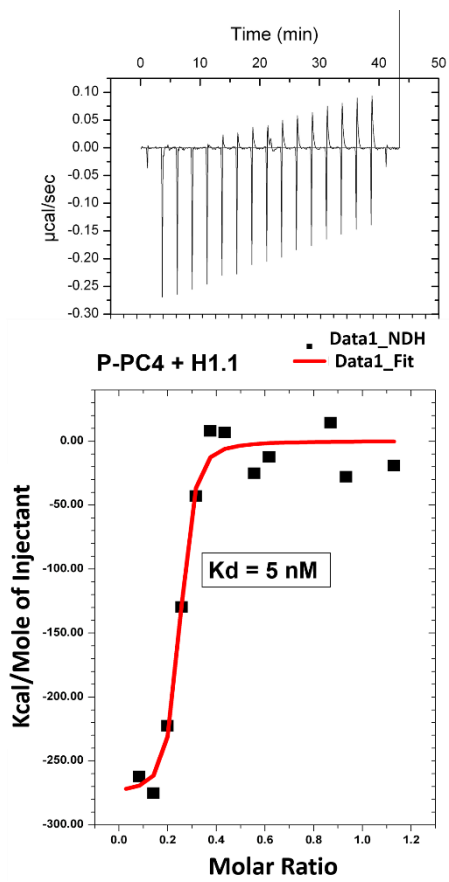

D

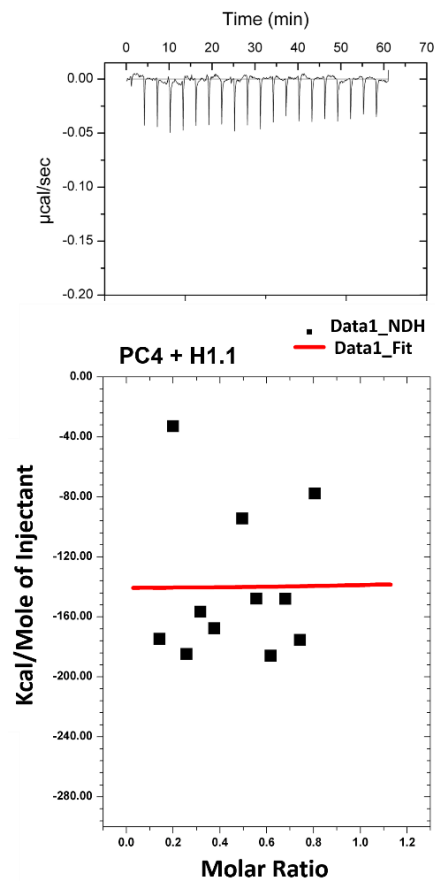

**FigureS1. Casein Kinase II mediated phosphorylation of PC4 is critical for its interaction with linker histone H1.** (A) *In vitro* kinase assay performed using 600ng of wild type and different phospho-defective mutants using [ $\gamma^{32}\text{P}$ ] ATP and commercially available casein kinase II (CKII) enzyme. (B) Table illustrating the extent of phosphorylation ability of different serine mutants of PC4. (C) Isothermal calorimetric titration of P-PC4 (Phosphorylated PC4 which has been re-purified after kinase assay) with linker H1.1 and (D) PC4-H1.1 were carried out to determine the enthalpy change and stoichiometry of interaction.

S2 A

|                                     | 13                       | 15  | 17    | 19      |
|-------------------------------------|--------------------------|-----|-------|---------|
| <b>Positive Coactivator 4 (PC4)</b> |                          |     |       |         |
| Homo sapiens                        | MPKSKELVSSSSSSGSDSDSEVDK | KL  | KR    | KKQVAPE |
| Mus musculus                        | MPKSKELVSSSSSSGSDSDSEVEK | KL  | KR    | KKQVAPE |
| Rattus norvegicus                   | MPKSKELVSSSSSSGSDSDSEVEK | KL  | KR    | KKQVVPE |
| Pan troglodytes                     | MPKSKELVSSSSSSGSDSDSEVDK | KL  | KR    | KKQVAPE |
| Gallus gallus                       | MPKSKELVSSSSSSASDSDSEVDK | K   | K     | KR      |
| Xenopus laevis                      | MPKSKEILSSSSSSGSDSDSEVDQ | K   | V     | KR      |
| Danio rerio                         | MPKSKEVLSS-TSG           | ESD | GDAET | KV      |

B

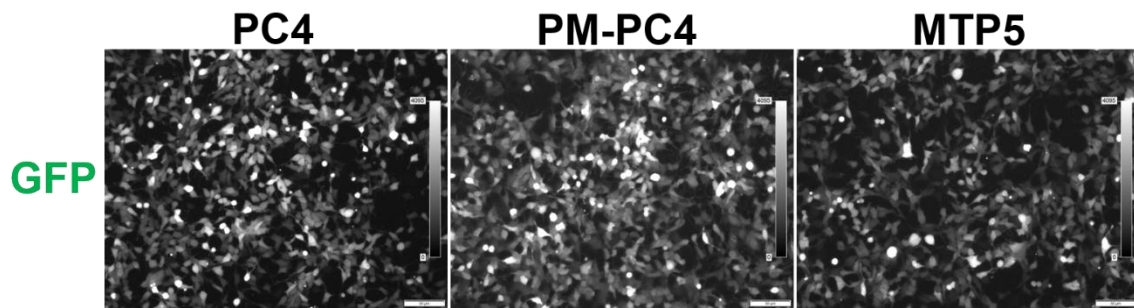

C

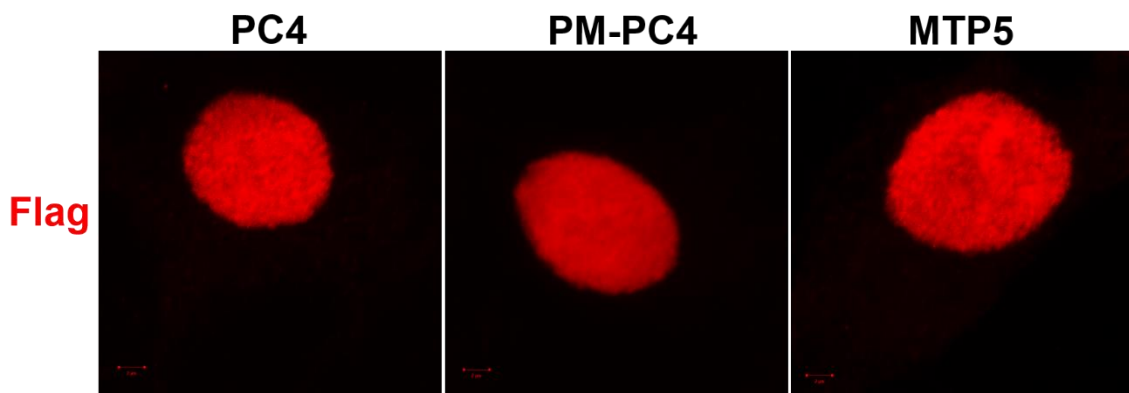

D

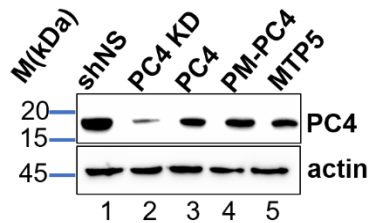

**FigureS2. Phosphomimic PC4 (PM-PC4) interacts with linker histone H1.** (A) Alignment of PC4 (*Homo sapiens*) surrounding the four serine residues 13,15,17 and 19 in different species. (B) HEK 293 cells transfected with PC4, PM-PC4 and MTP5 was analysed for GFP by fluorescent microscopy to validate the cellular localization of the PC4 constructs in pGIPZ vector backbone. (C) HEK 293 cells transfected with PC4, PM-PC4 and MTP5 in PC4 knockdown background was analysed for their subcellular localisation by fluorescent microscopy using anti-flag antibody. (D) Studying PC4 expression by western blotting in Flag tagged PC4, PM-PC4 and MTP5 expressing PC4 knockdown cells along with PC4 knockdown (PC4 KD) and vector control cells (shNS).

S3

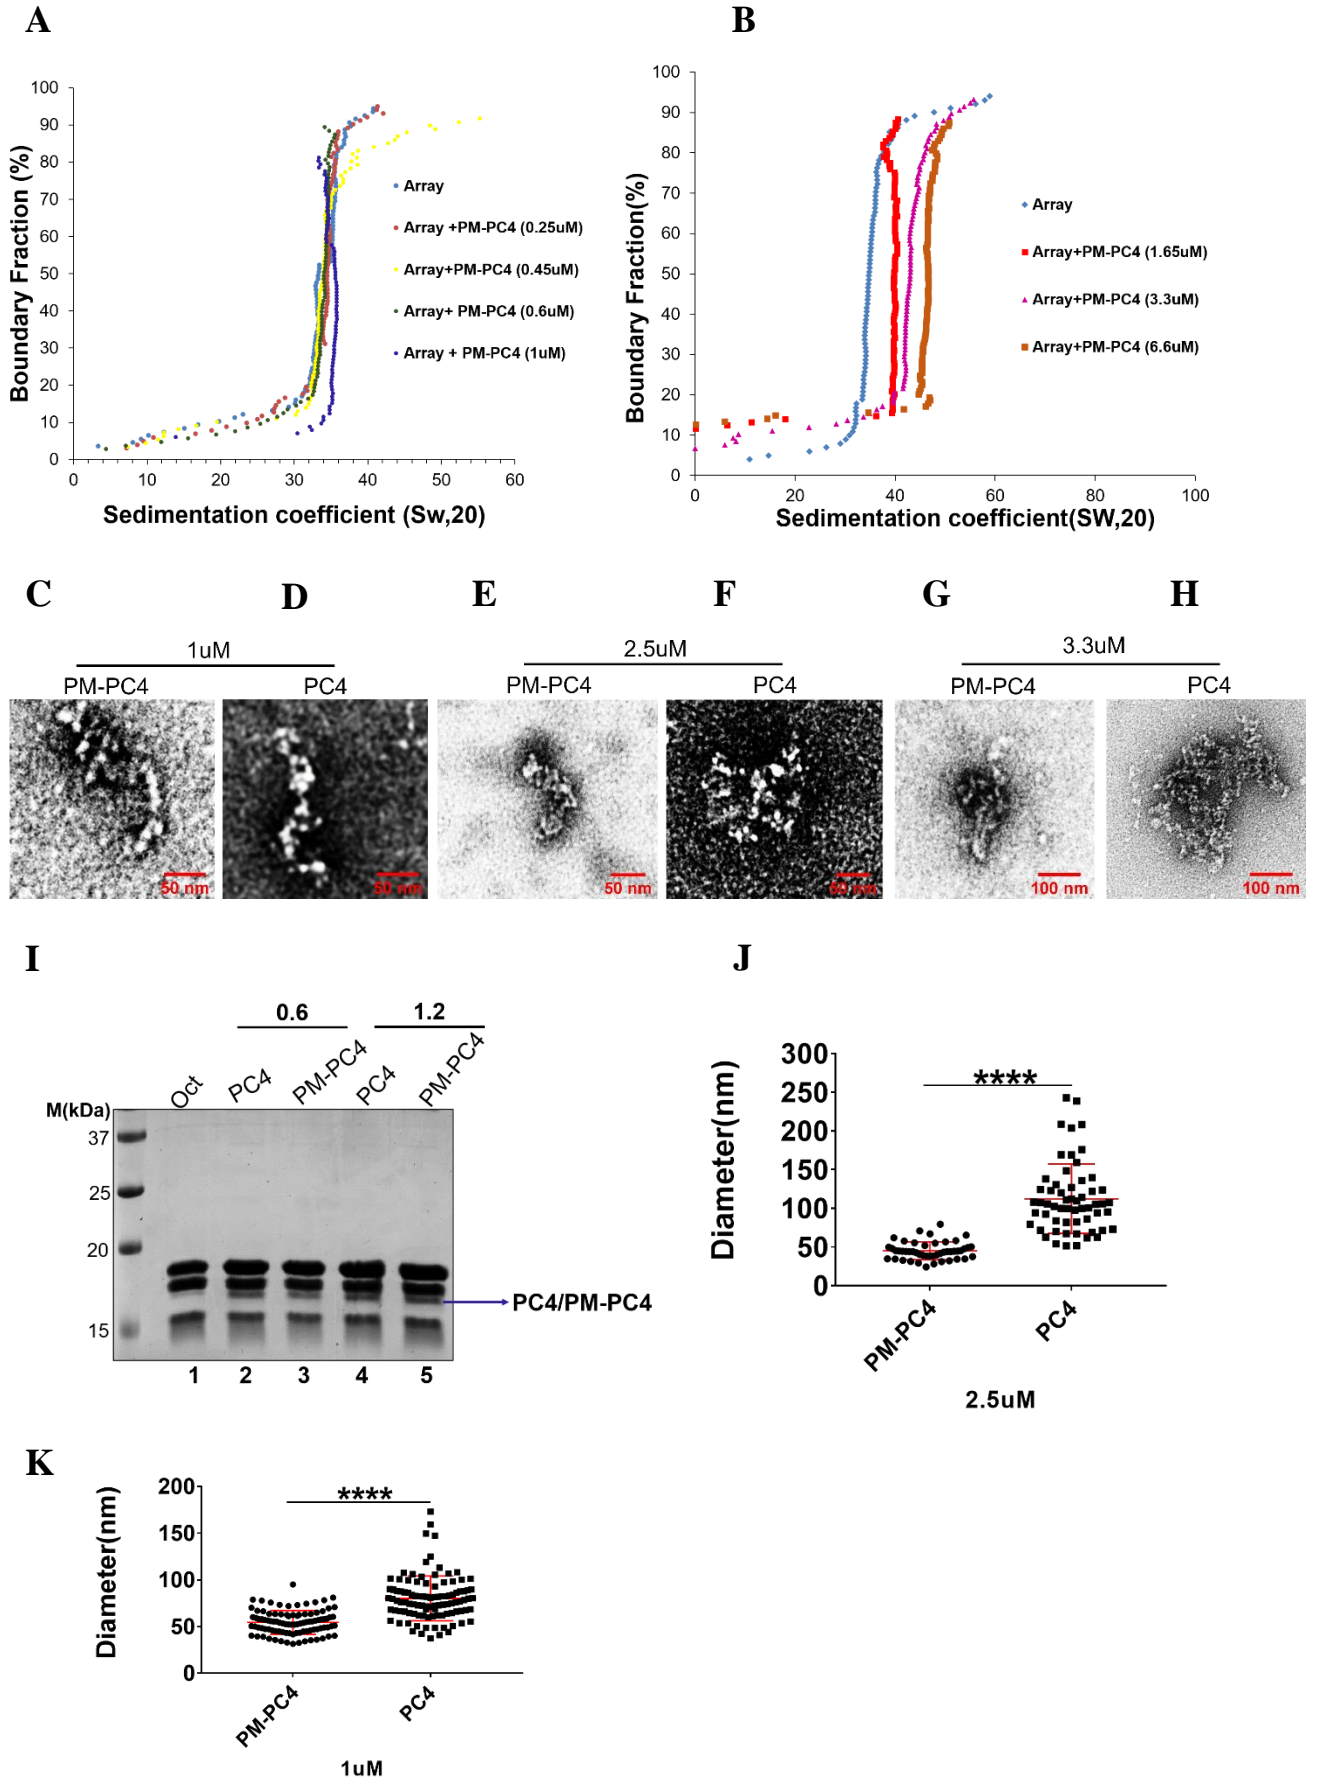

**FigureS3: Phosphomimic PC4 promotes condensation of an *in vitro* reconstituted nucleosomal array.** (A-B) Sedimentation velocity analysis by analytical ultracentrifugation upon titrating a wide range of PM-PC4 (phosphomimic PC4) bound nucleosome array. (C-H) EM images of nucleosome array upon compaction with increasing concentration of PM-PC4 (phosphomimic PC4) (C,E and G) and PC4 (wild type unmodified recombinant) (D, F and H) respectively. (I) SDS-PAGE analysis of the ratio of PC4 and PM-PC4 input to octamers used in (Fig.3B). (J) Distribution of diameters (in nm) of PM-PC4 and PC4 bound compacted array particles. No. of particles measured = 60. Data represent the means  $\pm$  SD. The S50%(S) were statistically analysed by Student's unpaired *t*-test (\* $p < 0.05$ , \*\* $p < 0.01$ , \*\*\* $p < 0.001$ , ns-non-significant). (K) Distribution of diameters (in nm) of PM-PC4 and PC4 bound compacted array particles . No. of particles measured = 102. Data represent the means  $\pm$  SD. The S50%(S) were statistically analysed by Student's unpaired *t*-test (\* $p < 0.05$ , \*\* $p < 0.01$ , \*\*\* $p < 0.001$ , ns-non-significant).

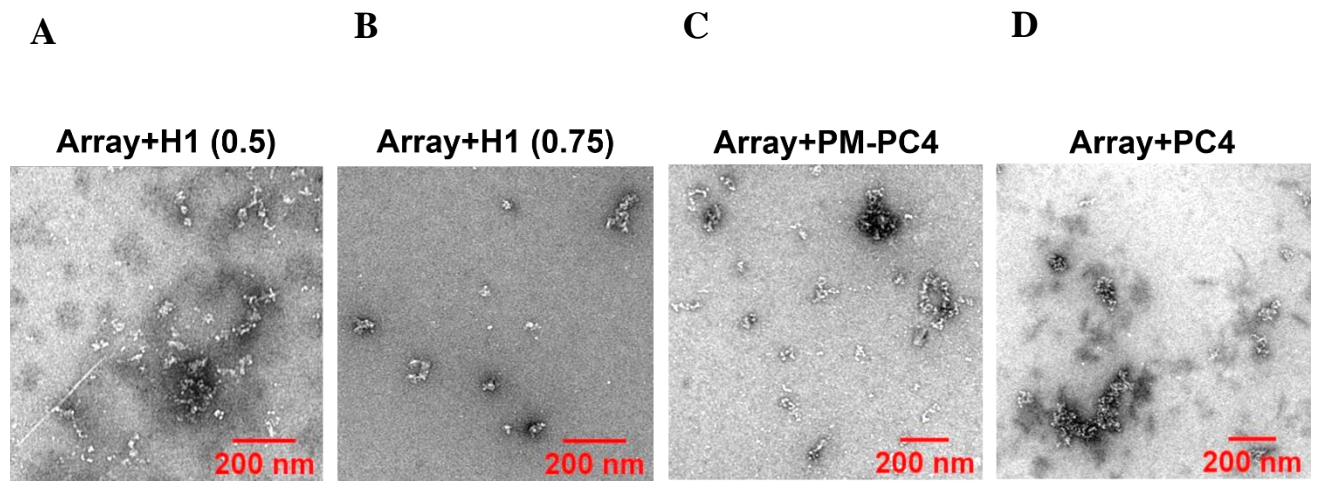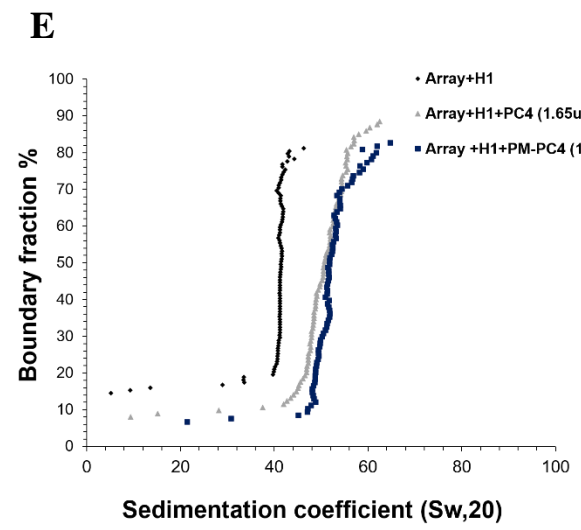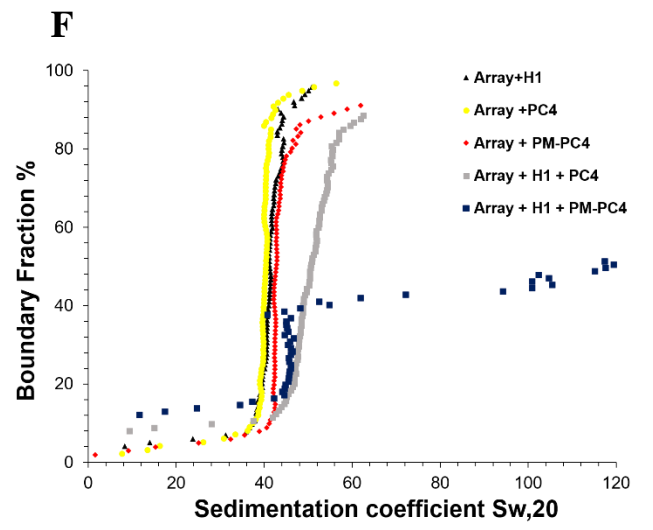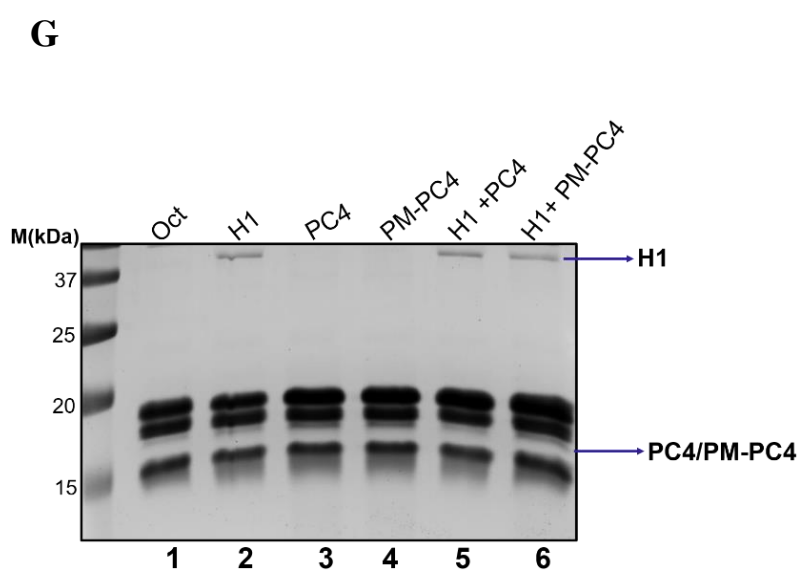

**Figure S4: Phosphorylation enhances PC4 mediated condensation of H1 bound array forming higher order structures.** (A-B) EM images of H1 bound array in the ratio of H1:NCP of 0.5 and 0.75 respectively. (C-D) 1 $\mu$ M of PC4 (wild type unmodified recombinant) and PM-PC4 (phosphomimic PC4) containing array respectively. (E) Sedimentation velocity analysis by analytical ultracentrifugation of H1 containing chromatin (H1:NCP is 0.5) with PM-PC4 (1 $\mu$ M) and PC4 (1.65 $\mu$ M). H1 containing nucleosome array was used as a control. (F) Sedimentation velocity analysis of H1 containing nucleosome (H1:NCP is 0.5) incubated with 1.65 $\mu$ M of PM-PC4 (phosphomimic PC4) and PC4 (wild type unmodified recombinant) shows aggregation of the H1-bound array in the presence of PM-PC4. A nucleosome array without any protein is used as a control. (G) SDS-PAGE analysis of the ratio of H1, PC4 and PM-PC4 input to octamers used in (Fig.4A).



Lane 1

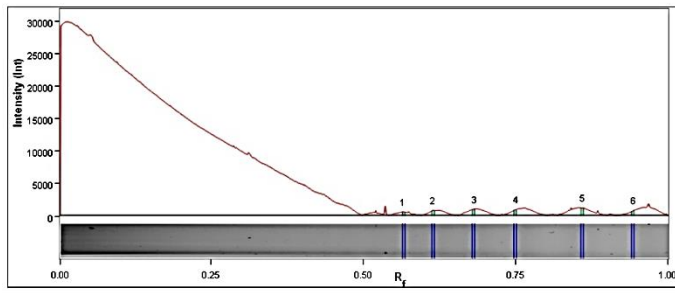

Lane 2

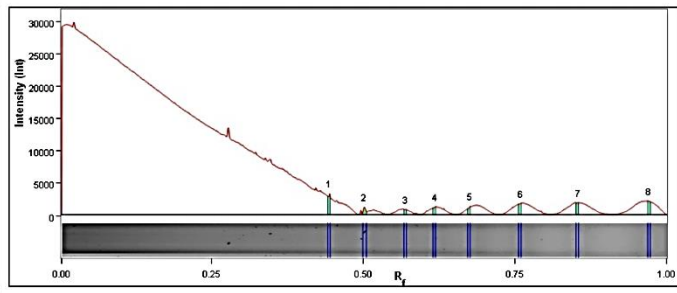

Lane 3

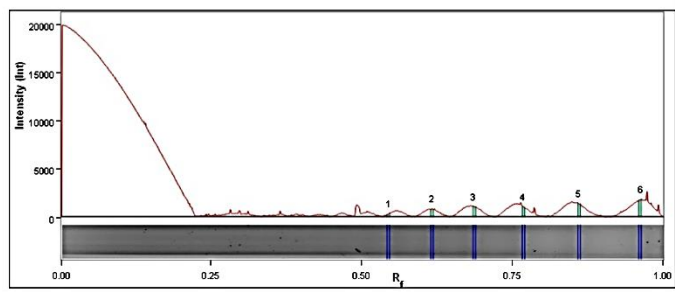

Lane 4

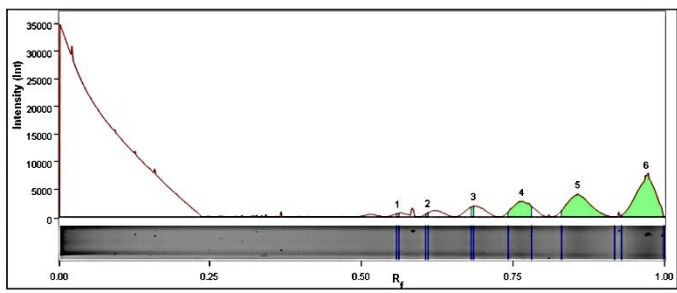

Lane 5

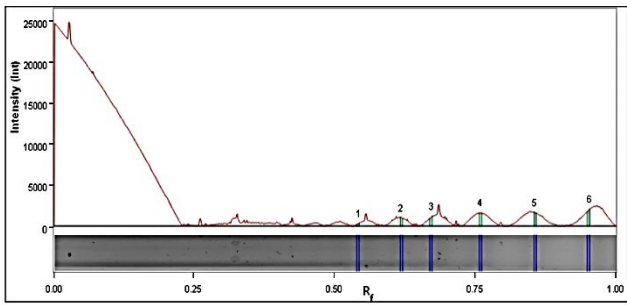

Lane 6

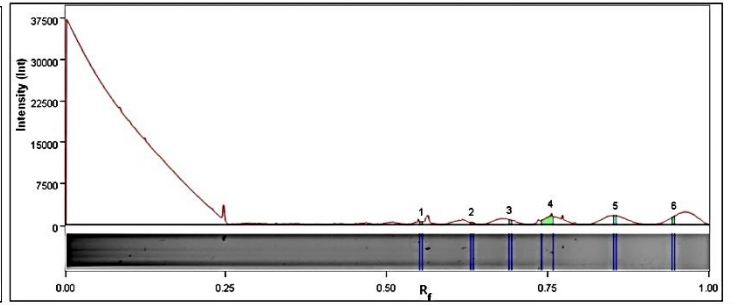

Lane 7

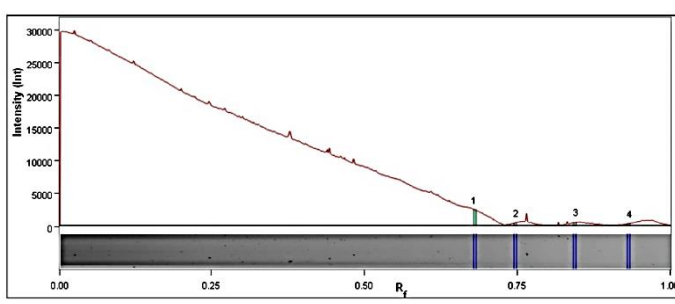

Lane 8

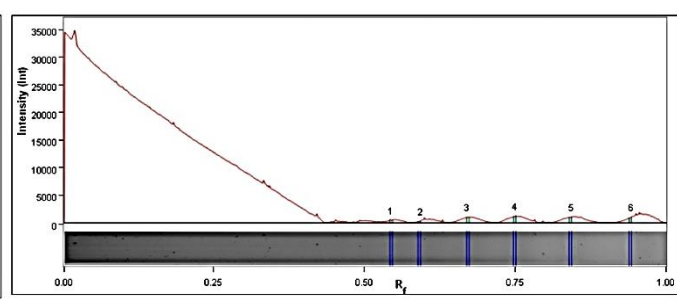

Lane 9

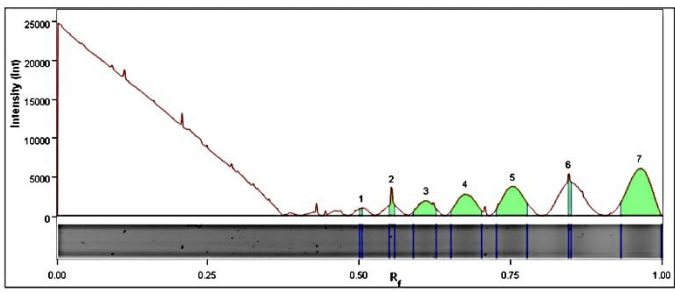

Lane 10

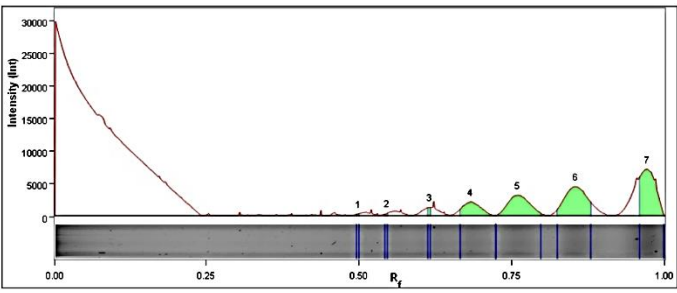

**Figure S5: Phosphorylation of PC4 regulates chromatin compaction and consequent histone modification status.** Band intensity analysis plot for each of the lanes shown in Fig.5A.

S6

A

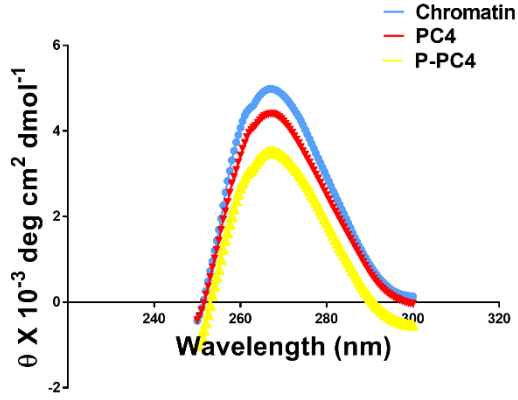

B

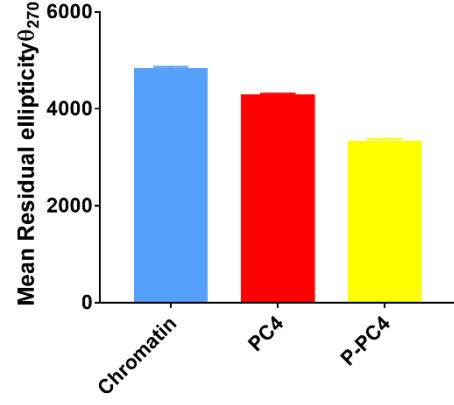

C

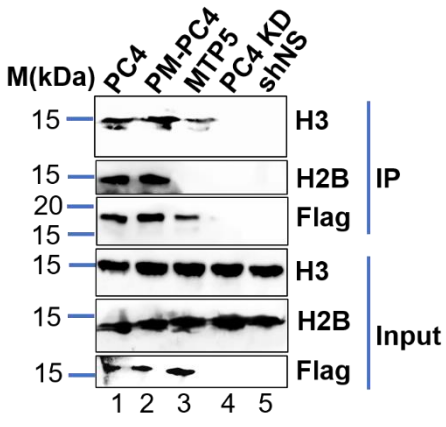

**Figure S6: Phosphorylation of PC4 regulates chromatin compaction and consequent histone modification status.** (A) Circular dichroism (CD) spectroscopy of P-PC4 and PC4 incubated with H1-stripped chromatin, isolated and purified by sucrose gradient from HeLa cells, for 30 mins and subjected to CD spectroscopy. (B) Quantitative representation of the mean residue ellipticity value plotted for the corresponding CD spectra in (A). (C) Immunopulldown using Flag antibody carried out in PC4, PM-PC4 and MTP5 expressing PC4 knockdown cells from the chromatin fraction and probed with H3 and H2B antibody.

**A**

**PC4 vs PC4 KD**

| Name         | Change    | Fold change (log2) |
|--------------|-----------|--------------------|
| TET1         | Decreased | -3.02737123        |
| GCM2         | Decreased | -2.577207953       |
| RNA5SP38     | Decreased | -2.268758224       |
| RP11-65D24.2 | Decreased | -2.510963904       |
| LMO7         | Decreased | -2.013727828       |
| ZNHIT6       | Decreased | -1.79588962        |
| IPMK         | Decreased | -1.676840241       |
| FAM204CP     | Decreased | -1.545611061       |
| SNRPGP9      | Decreased | -1.539182157       |
| PTPRO        | Increased | 2.035370475        |
| JAKMIP2      | Increased | 2.334621637        |
| DMRT2        | Increased | 3.151895985        |
| SYNE1        | Increased | 3.135653669        |
| ZNF473       | Increased | 4.005089389        |
| GH1          | Increased | 4.098320991        |

**B**

**PM-PC4 vs PC4 KD**

| Name          | Change    | Fold change (log2) |
|---------------|-----------|--------------------|
| RP11-65D24.2  | Decreased | -4.092834419       |
| Y_RNA         | Decreased | -3.042971151       |
| TET1          | Decreased | -2.784275777       |
| RP11-6J24.3   | Decreased | -2.608488694       |
| RP11-170N11.1 | Decreased | -2.556447887       |
| AC074121.4    | Decreased | -2.158780756       |
| FAM204CP      | Decreased | -2.132614626       |
| SNRPGP9       | Decreased | -2.032164847       |
| DPPA2         | Decreased | -1.839925836       |
| MET           | Decreased | -1.764417564       |
| JAKMIP2       | Increased | 2.38               |
| RP11-460N16.1 | Increased | 2.48               |
| GH1           | Increased | 3.43               |
| DMRT2         | Increased | 3.86               |
| RP11-782E2.2  | Increased | 5.04               |

**C**

**MTP5 vs PC4 KD**

| Name          | Change    | Fold change (log2) |
|---------------|-----------|--------------------|
| LINC00319     | Decreased | -2.4339614         |
| RP11-6J24.3   | Decreased | -2.2217879         |
| ADPRHL1       | Decreased | -2.1593019         |
| Y_RNA         | Decreased | -1.9669342         |
| RP11-170N11.1 | Decreased | -1.8461394         |
| SNRPGP9       | Decreased | -1.6352571         |
| MIR585        | Increased | 1.8                |
| MDGA2         | Increased | 1.81               |
| ATO8          | Increased | 2.14               |
| JAKMIP2       | Increased | 2.28               |
| FGF13-AS1     | Increased | 2.33               |
| MON2          | Increased | 2.38               |
| ANKAR         | Increased | 2.66               |
| DMRT2         | Increased | 3.31               |
| GH1           | Increased | 3.88               |

**D**

**Overlap of total ATAC-seq peaks with CHIP-seq peaks of different histone marks**

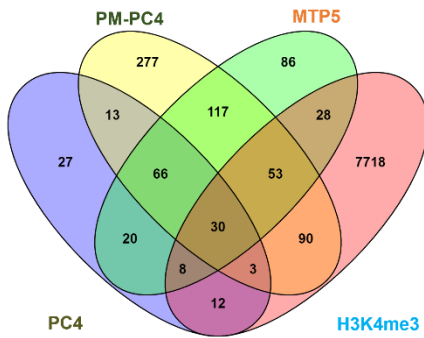

**E**

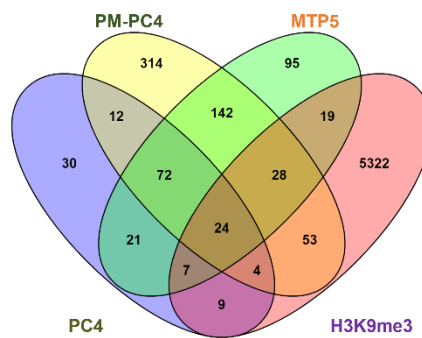

**F**

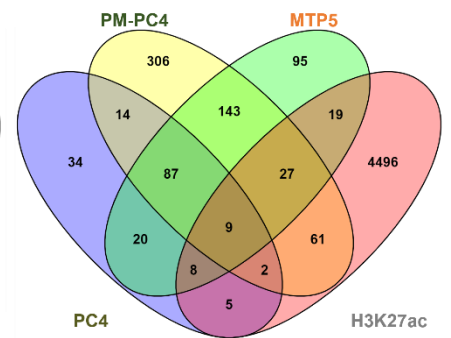

**G**

**Overlap of Depleted ATAC-seq peaks with CHIP-seq peaks of different histone marks**

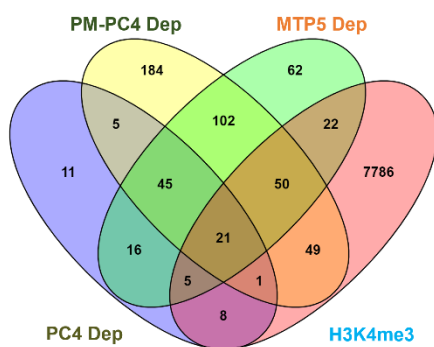

**H**

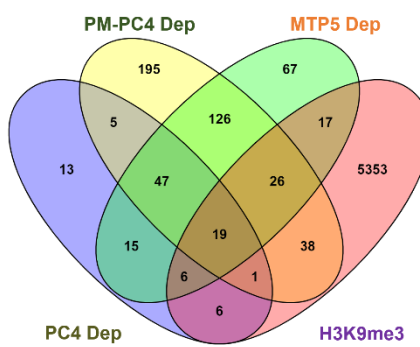

**I**

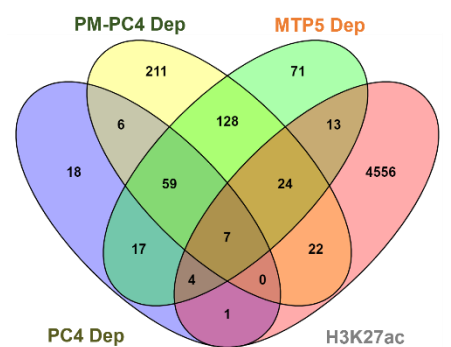

**Figures S7: Phosphorylation of PC4 affects chromatin accessibility of various genomic regions harbouring diverse histone marks.** (A) List of the top 15 significantly altered ATAC-seq peaks in PC4 relative to PC4 KD. (B) List of the top 15 significantly altered ATAC-seq peaks in PM-PC4 relative to PC4 KD. (C) List of the top 15 significantly altered ATAC-seq peaks in MTP5 relative to PC4 KD. (D) Venn diagram showing the overlap of all the differential ATAC-seq peaks in PC4, PM-PC4 and MTP5 relative to PC4 KD with H3K4me3 ChIP-seq. (E) Venn diagram showing the overlap of all the differential ATAC-seq peaks in PC4, PM-PC4 and MTP5 relative to PC4 KD with H3K9me3 ChIP-seq. (F) Venn diagram showing the overlap of all the differential ATAC-seq peaks in PC4, PM-PC4 and MTP5 relative to PC4 KD with H3K27ac ChIP-seq. (G) Venn diagram showing the overlap of the ATAC-seq peaks depleted in PC4, PM-PC4 and MTP5 relative to PC4 KD with H3K4me3 ChIP-seq. (H) Venn diagram showing the overlap of the ATAC-seq peaks depleted in PC4, PM-PC4 and MTP5 relative to PC4 KD with H3K9me3 ChIP-seq. (I) Venn diagram showing the overlap of the ATAC-seq peaks depleted in PC4, PM-PC4 and MTP5 relative to PC4 KD with H3K27ac ChIP-seq.

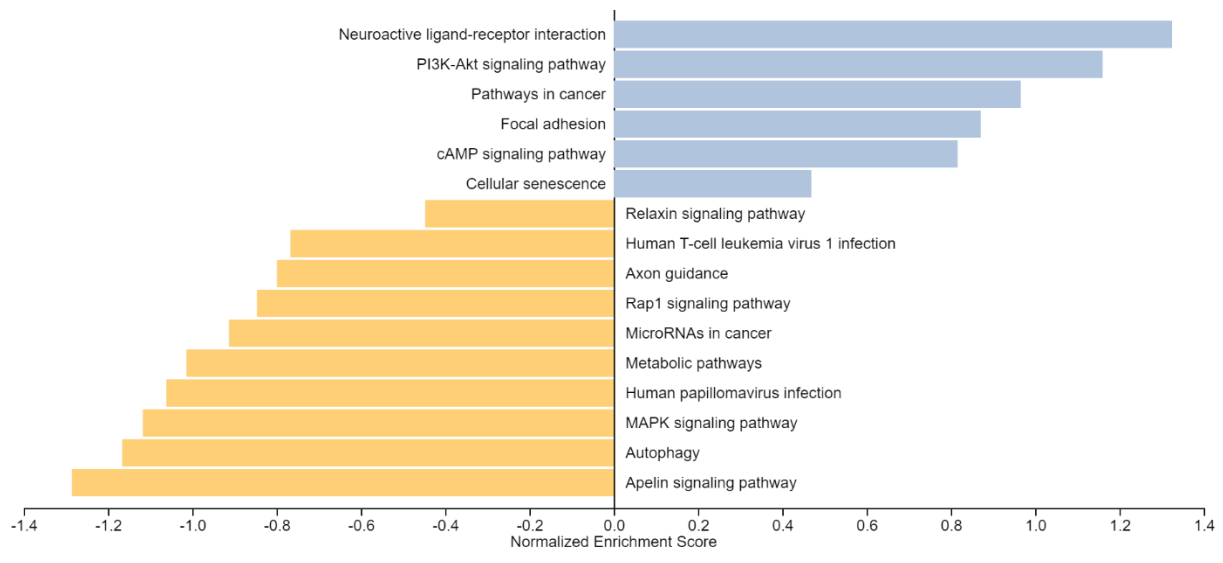

B

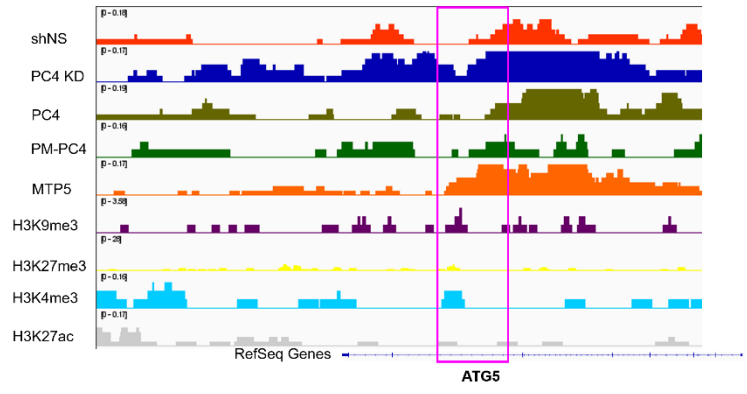

C

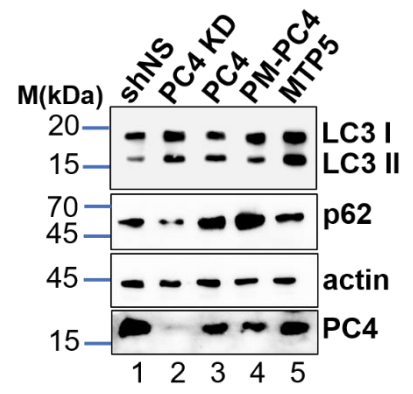

D

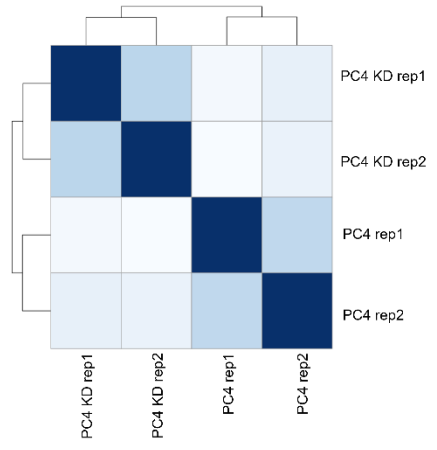

E

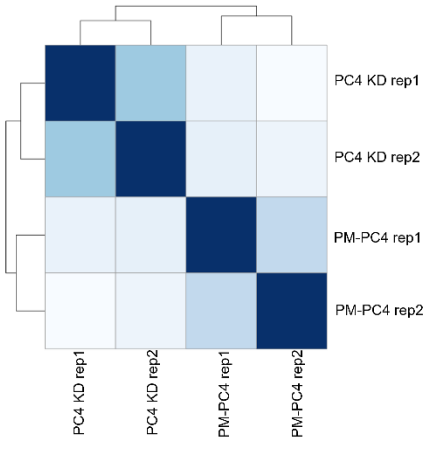

F

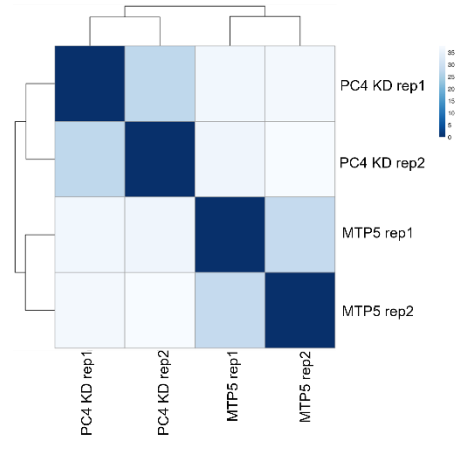

**FigureS8: Phosphorylation of PC4 affects gene transcription by inhibiting chromatin accessibility.** (A) GSEA-defined KEGG pathways obtained from mapping the differential ATAC-seq peaks of  $\log_2(\text{Fold change}) > 1.5$  and  $< -1.5$ , present in PC4 and PM-PC4 but not present in MTP5 using WEB-based GEne SeT AnaLysis Tool kit (WebGestalt). Positive and negative enrichment scores, respectively, indicate up- and down-regulation of these pathways with respect to PC4 KD cells. (B) Integrative Genomics Viewer (IGV) images showing ATAC-seq intensities in shNS, PC4 KD, PC4, PM-PC4 and MTP5 cells, on representative loci of the core autophagy gene ATG5, along with the published histone modification ChIP seq tracts in HEK293 cells (1–3). (C) Studying the levels of autophagy upon transfecting Flag-PC4 (PC4), Flag-Phosphomimic PC4 (PM-PC4) and Flag-phospho-defective mutant PC4 (MTP5) in PC4 knockdown HEK293 by probing with LC3 and p62 antibody while actin was used as loading control. (D-F) ATAC-seq signal within consensus ATAC-seq peaks was compared between the replicate batches using Spearman's  $\rho$  to cluster samples for each of the comparisons; PC4 vs PC4 KD, PM-PC4 vs PC4 KD and MTP5 vs PC4 KD respectively.

| Sl. No. | Gene Name         | Forward Primer (5'-3')           | Reverse Primer (5'-3')          |
|---------|-------------------|----------------------------------|---------------------------------|
| 1       | <i>β-Actin</i>    | AGATGTGGATCAGCAAGC<br>AGGAGT     | TCCTCGGCCACATTGTGAACTT<br>TG    |
| 2       | <i>SCN2</i>       | GCTTTCTGATGTCATGATC<br>TTGACTGTG | CGTGTAGCCATAGTTGGGGTTT<br>CTACC |
| 3       | <i>GAD1</i>       | GCGCCCCACAACGTACGA<br>TACC       | CACCACTTCCAGGAGGAATTG<br>C      |
| 4       | <i>M4</i>         | GGCCTCATGATTGCTGCT<br>GCC        | GGCTCTTGAGGAAGGCCAG             |
| 5       | <i>AMPKalpha1</i> | GTCAAAGCCGACCCAATG<br>ATA        | CGTACACGCAAATAATAGGGG<br>TT     |
| 6       | <i>AMPKalpha2</i> | CAGGCCATAAAGTGGCAG<br>TTA        | AAAAGTCTGTCTGGAGTGCTGA          |
| 7       | <i>ULK1</i>       | GTCACACGCCACATAACA<br>GA         | CCATCAAGGTGATGAGGAAGA<br>A      |
| 8       | <i>ULK2</i>       | CCCTCCCAAGTCTCATGTT<br>TAG       | TCTGATGTGGTTTCCTCTGATG          |
| 9       | <i>DRAM1</i>      | GTCAGCCGCCTTCATTATC<br>T         | CACTCTCTGGAGGTGTTGTTC           |
| 10      | <i>PC4</i>        | AGGTGAGACTTCGAGAGC<br>CCTGT      | TTCAGCTGGCTCCATTGTTCTG<br>G     |
| 11      | <i>UVRAG</i>      | AGGATTACTTTGTATGCG<br>GTGTC      | CAGGTTGGGAAGGGTTTGC             |
| 12      | <i>IPMK</i>       | ACCAGCATTACGGAAGAA<br>GCTT       | TGGCAGCAACAGCATCTTTT            |
| 13      | <i>MAP3K7</i>     | CCGGTGAGATGATCGAAG<br>CC         | GCCGAAGCTCTACAATAAACG<br>C      |
| 14      | <i>YEATS2</i>     | GGCAGTTGGATAACCAGAC<br>AGC       | CCGCTCACTGGTCCTCATTC            |

**Table S1:** Sequences for different real time-PCR primers used for the genes mentioned



| Sl. No | Gene Name     | Forward Primer (5'-3')    | Reverse Primer (5'-3')       |
|--------|---------------|---------------------------|------------------------------|
| 1      | <i>IPMK</i>   | CACCCTGTGCCAAACACATC      | AAGCAAGGAGACCCATAAGCC        |
| 2      | <i>UVRAG</i>  | GAGATGCTACACCACTCTGCCT    | GGATTTACG TTCAGCTACAAGCC     |
| 3      | <i>MAP3K7</i> | GAAGGGTGCATACCAGAC<br>AGA | CTCTGAGCTAGCTGCGTAAGAAT<br>A |
| 4      | <i>HNF4A</i>  | TCCGTTGGCTCTGGATAATG      | CACGTAGTGTCCGATCTTCAC        |

**Table S2:** Sequences for different ChIP-PCR primers used for the genes mentioned

#### *Analysis of ATAC-seq data*

Adapter sequences were trimmed from the raw ATAC-seq reads with CutAdapt v1.121 (4). Trimmed reads of each sample were mapped to the reference human genome build GRCh37/hg19 by using Bowtie2 v2.3.2 with default settings (5). Picard tools (<http://broadinstitute.github.io/picard/>) v1.126 was used to remove PCR duplicated reads and for insert size distribution analysis. Reads mapping to mitochondrial DNA and the Y chromosome were filtered and only uniquely mapping paired reads with a quality score  $\geq 30$  were kept for subsequent analysis. The read start sites were adjusted to represent the center of the transposon binding event (5bp on forward strand and 4bp on reverse strand) as described (6). Phantompeakqualtools v2.0 was used to calculate the strand cross-correlation and deepTools v2.0.1 was used to calculate correlation between samples (7). MACS2 v2.1.0 was used for peak calling with parameters “--nomodel--nolambda-keep-dup all--call-summits-g hs-B”, and peaks were filtered based on default settings and false discovery rate (FDR)  $< 0.1$  (8). Peaks in regions known to show artificially high signal were filtered using the hg19 blacklist file from ENCODE. BEDTools v2.26.07 was used for various analyses based on peak locations. Peaks located less than 50bp apart were merged in order to facilitate comparison between samples. The whole ATAC-seq workflow was implemented in Snakemake. All sequencing track figures were generated with the integrative genome browser (IGV).

### *Gene Set Enrichment Analysis (GSEA):*

GSEA method was carried out using pathway- KEGG enrichment category using WebGestalt (WEB-based Gene SeT AnaLysis Toolkit) functional enrichment analysis web tool (9–11).

### *Antibodies*

Anti-PC4 (in-house-generated polyclonal antibody), anti-histone H3 (in-house-generated polyclonal antibody), anti-histone H2B (in-house-generated polyclonal antibody), anti-H3K9ac (Abcam, ab16635, Cambridge, UK), anti-H3K4me3 (Millipore, #07-473), anti-H2B tetra-acetylation (Millipore, #07-373), anti-H3K9me2 (abcam, 1220), anti-FLAG (Sigma, F1804, Lot no. SLBK1346V), anti-actin HRP conjugated (Sigma), Goat Anti-Rabbit IgG H&L (HRP; Abcam, Cat No. ab97051, Lot No. GR288027-9), Goat Anti-Mouse IgG H&L (HRP; Abcam, Cat No. ab97023, Lot No. GR298142-12), F(ab')<sub>2</sub>-Goat anti-mouse IgG (H + L) Cross-Adsorbed Secondary Antibody, Alexa Fluor 568 (A11004, RRID:AB\_2534072, Life Technologies), anti-H1.2 (abcam, Cat No. ab181973), anti-H1 (in-house-generated polyclonal antibody), anti-p62 (Sigma P0067), anti-MAP1LC3B (Sigma L7543).

### **References:**

1. Hattori, T., Lai, D., Dementieva, I.S., Montañó, S.P., Kurosawa, K., Zheng, Y., Akin, L.R., Świst-Rosowska, K.M., Grzybowski, A.T., Koide, A., *et al.* (2016) Antigen clasping by two antigen-binding sites of an exceptionally specific antibody for histone methylation. *Proceedings of the National Academy of Sciences of the United States of America*, **113**, 2092–7.
2. Lamb, K.N., Bsteh, D., Dishman, S.N., Moussa, H.F., Fan, H., Stuckey, J.I., Norris, J.L., Cholensky, S.H., Li, D., Wang, J., *et al.* (2019) Discovery and Characterization of a Cellular Potent Positive Allosteric Modulator of the Polycomb Repressive Complex 1 Chromodomain, CBX7. *Cell chemical biology*, **26**, 1365-1379.e22.
3. Morgan, M.A.J., Rickels, R.A., Collings, C.K., He, X., Cao, K., Herz, H.-M., Cozzolino, K.A., Abshiru, N.A., Marshall, S.A., Rendleman, E.J., *et al.* (2017) A cryptic Tudor domain links BRWD2/PHIP to COMPASS-mediated histone H3K4 methylation. *Genes & development*, **31**, 2003–2014.
4. M, M. (2011) Cutadapt Removes Adapter Sequences From High-Throughput Sequencing Reads. *EMBnet journal*, **17**, 10-12.
5. Langmead, B. and Salzberg, S.L. (2012) Fast gapped-read alignment with Bowtie 2 : Nature Methods : Nature Publishing Group. *Nat Meth*, **4**, 357-9.
6. Buenrostro, J.D., Giresi, P.G., Zaba, L.C., Chang, H.Y. and Greenleaf, W.J. (2013) Transposition of native chromatin for fast and sensitive epigenomic profiling of open chromatin, DNA-binding proteins and nucleosome position. *Nature Methods*, **10**, 1213-8.

7. Ramírez,F., Ryan,D.P., Grüning,B., Bhardwaj,V., Kilpert,F., Richter,A.S., Heyne,S., Dündar,F. and Manke,T. (2016) deepTools2: a next generation web server for deep-sequencing data analysis. *Nucleic acids research*, **44**, W160-5.
8. Zhang,Y., Liu,T., Meyer,C.A., Eeckhoute,J., Johnson,D.S., Bernstein,B.E., Nussbaum,C., Myers,R.M., Brown,M., Li,W., *et al.* (2008) Model-based analysis of ChIP-Seq (MACS). *Genome Biology*, **9**, R137.
9. Zhang,B., Kirov,S. and Snoddy,J. (2005) WebGestalt: An integrated system for exploring gene sets in various biological contexts. *Nucleic Acids Research*, **33**, W741-8.
10. Wang,J., Vasaikar,S., Shi,Z., Greer,M. and Zhang,B. (2017) WebGestalt 2017: A more comprehensive, powerful, flexible and interactive gene set enrichment analysis toolkit. *Nucleic Acids Research*, **45**, W130-W137.
11. Liao,Y., Wang,J., Jaehnig,E.J., Shi,Z. and Zhang,B. (2019) WebGestalt 2019: gene set analysis toolkit with revamped UIs and APIs. *Nucleic Acids Research*, **47**, W199-W205.
